# Supplementary material for: Inferring on Speleomantes Foraging Behavior from Gut Contents Examination
Source: MDPI journal article supplement (doi:10.3390/ani13172782), 2023-08-31
Supplement: s1 [file s1]

Table S1. Dataset gathering information on *Speleomantes* gut contents analyzed in this study.

| <b>Prey category</b>     | <b>Number of recognized items</b> | <b>Percentage related to the total number of recognized prey items</b> |
|--------------------------|-----------------------------------|------------------------------------------------------------------------|
| Pulmonata                | 120                               | 0.68                                                                   |
| Sarcoptiformes           | 210                               | 1.19                                                                   |
| Mesostigmata             | 38                                | 0.22                                                                   |
| Trombidiformes           | 33                                | 0.19                                                                   |
| Araneae                  | 684                               | 3.88                                                                   |
| Pseudoscorpiones         | 260                               | 1.47                                                                   |
| Opiliones                | 79                                | 0.45                                                                   |
| Lithobiomorpha           | 41                                | 0.23                                                                   |
| Geophilomorpha           | 26                                | 0.15                                                                   |
| Scolopendromorpha        | 8                                 | 0.05                                                                   |
| Julida                   | 83                                | 0.47                                                                   |
| Glomerida                | 10                                | 0.06                                                                   |
| Polydesmida              | 234                               | 1.33                                                                   |
| Isopoda                  | 242                               | 1.37                                                                   |
| Symphyleona              | 638                               | 3.62                                                                   |
| Poduromorpha             | 52                                | 0.29                                                                   |
| Entomobryomorpha         | 701                               | 3.98                                                                   |
| Zygentoma                | 4                                 | 0.02                                                                   |
| Ephemeroptera            | 1                                 | 0.01                                                                   |
| Odonata_ninfa            | 1                                 | 0.01                                                                   |
| Orthoptera               | 41                                | 0.23                                                                   |
| Blattodea                | 21                                | 0.12                                                                   |
| Psocodea                 | 17                                | 0.10                                                                   |
| Hemiptera                | 408                               | 2.31                                                                   |
| Endopterygota_larva      | 1                                 | 0.01                                                                   |
| Hymenoptera              | 885                               | 5.02                                                                   |
| Hymenoptera_Formicidae   | 385                               | 2.18                                                                   |
| Coleoptera               | 1247                              | 7.07                                                                   |
| Coleoptera_Staphylinidae | 1026                              | 5.82                                                                   |
| Coleoptera_larva         | 97                                | 0.55                                                                   |
| Neuroptera               | 2                                 | 0.01                                                                   |
| Mecoptera                | 2                                 | 0.01                                                                   |
| Trichoptera              | 29                                | 0.16                                                                   |
| Plecoptera               | 192                               | 1.09                                                                   |
| Lepidoptera              | 29                                | 0.16                                                                   |
| Lepidoptera_larva        | 73                                | 0.41                                                                   |

|               |      |       |
|---------------|------|-------|
| Diptera       | 9112 | 51.68 |
| Diptera_larva | 512  | 2.90  |
| Archaeognatha | 26   | 0.15  |
| Tricladida    | 1    | 0.01  |
| Gordea        | 2    | 0.01  |
| Nematoda      | 10   | 0.06  |
| Haplotaxida   | 37   | 0.21  |
| Siphonaptera  | 3    | 0.02  |
| Dermaptera    | 5    | 0.03  |
| Ixodida       | 2    | 0.01  |
